# Supplementary material for: In situ synthesis of g-C3N4/TiO2 heterostructures with enhanced photocatalytic hydrogen evolution under visible light
Source: Royal Society of Chemistry journal article supplement (doi:10.1039/c7ra06786k), 2017-01-01
Supplement: c7ra06786k1.pdf [file c7ra06786k1.pdf]

## Supporting Information:

### ***In situ* synthesis of g-C<sub>3</sub>N<sub>4</sub>/TiO<sub>2</sub> heterostructures with enhanced photocatalytic hydrogen evolution under visible light**

Hui Zhang<sup>1</sup>, Feng Liu<sup>1</sup>, Hao Wu<sup>1</sup>, Xin Cao<sup>1</sup>, Jianhua Sun<sup>1,\*</sup> and Weiwei Lei<sup>2,\*</sup>

<sup>1</sup> School of Chemistry and Environmental Engineering, Jiangsu University of Technology, Changzhou 213001, Jiangsu Province, P. R. China. E-mail: sunjh@jsut.edu.cn

<sup>2</sup> Institute for Frontier Materials, Deakin University, Waurn Ponds, Victoria 3216, Australia. E-mail: weiwei.lei@deakin.edu.au

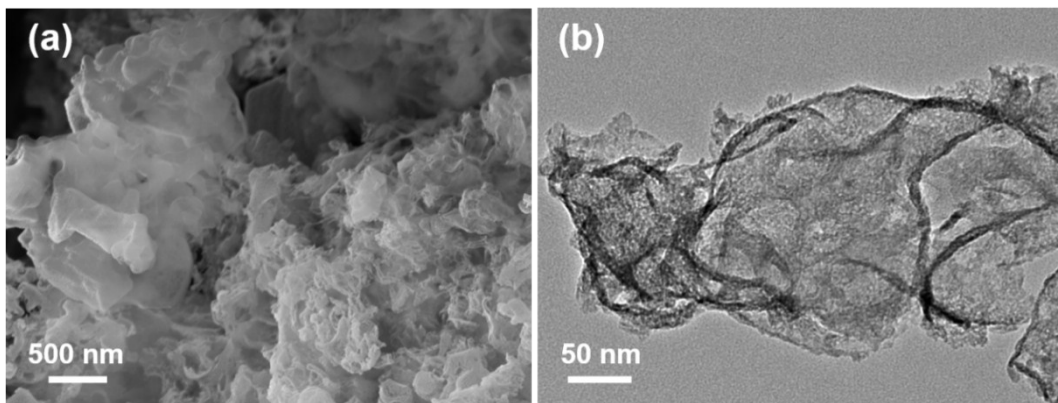

**Fig. S1** (a) SEM and (b) TEM images of CNTO-0.

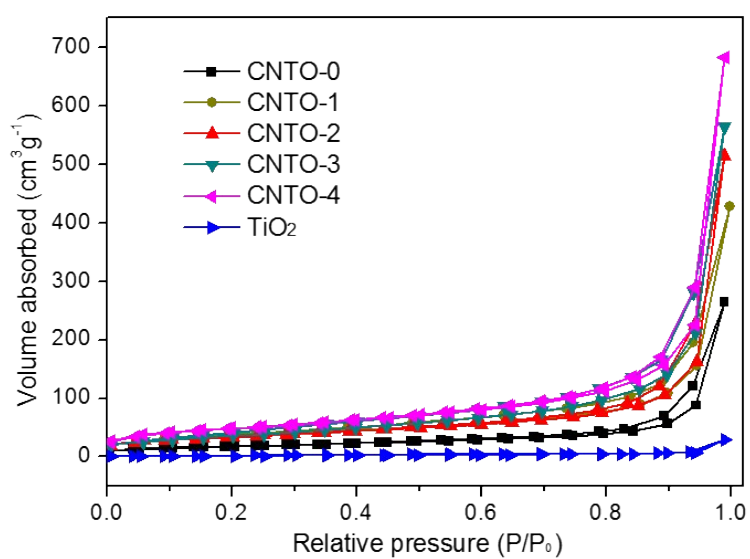

**Fig. S2** Nitrogen sorption isotherms of CNTO-x and TiO<sub>2</sub>.

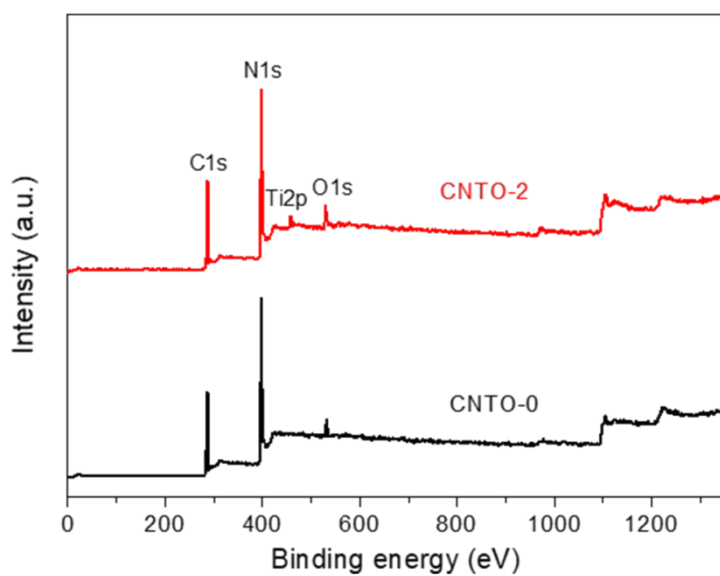

**Fig. S3** Full scan XPS spectra of CNTO-0 and CNTO-2.

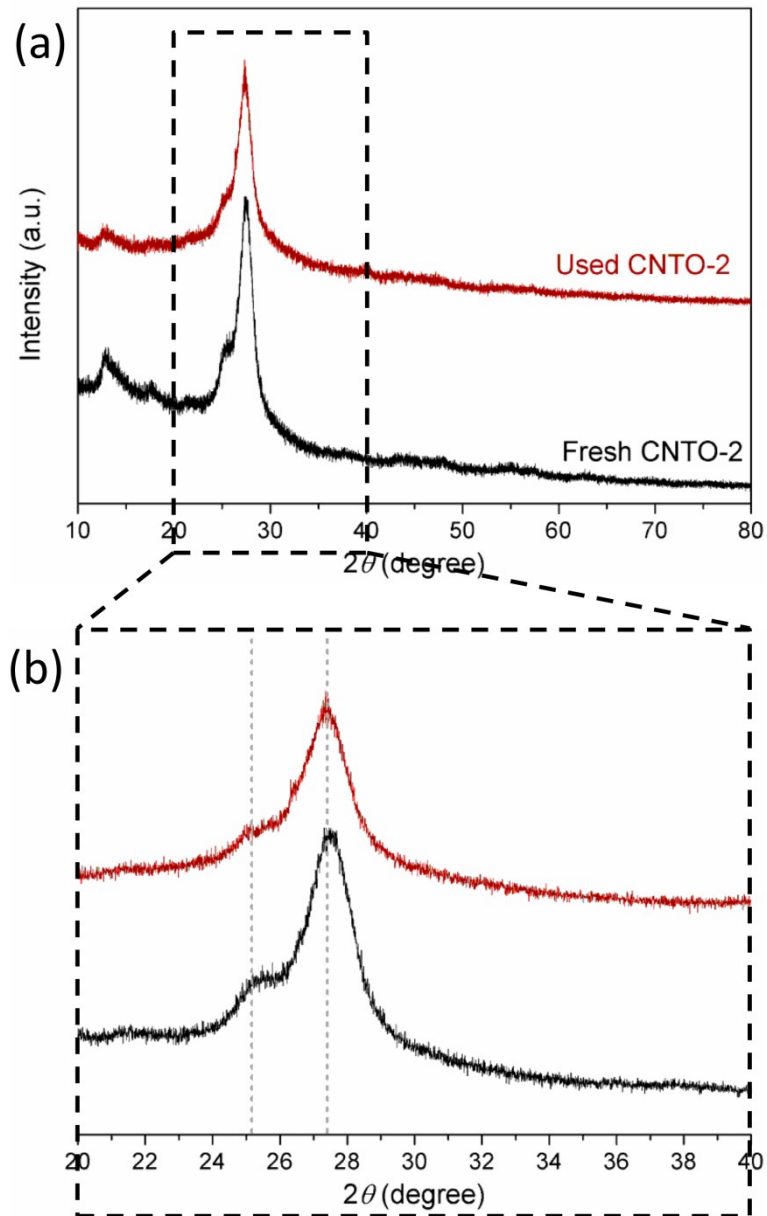

**Fig. S4** The XRD patterns of CNTO-2 before and after 12 h of photocatalytic  $H_2$  evolution. (b) is the magnified view of the selected region in (a).

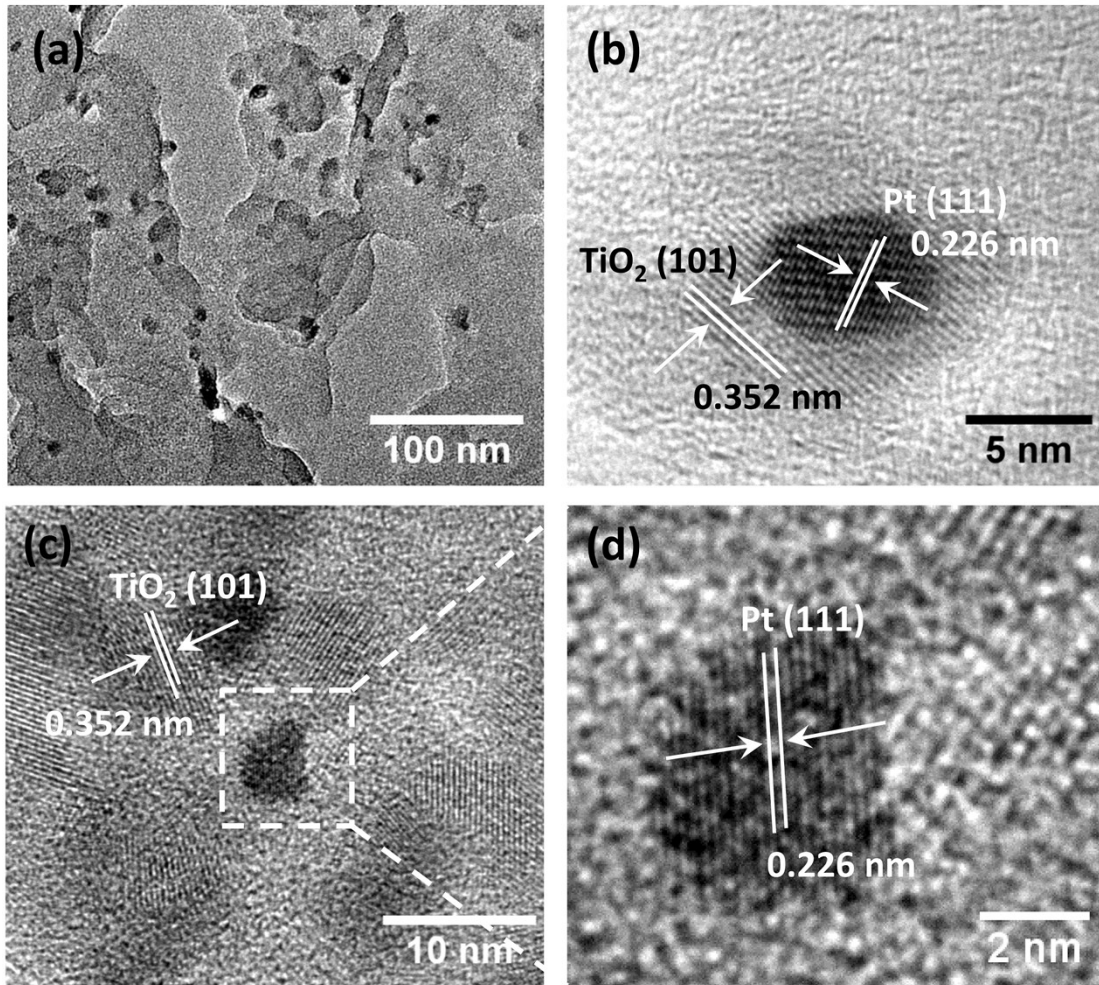

**Fig. S5** (a) TEM and (b, c, d) HRTEM images of CNTO-2 after 12 h photocatalytic H<sub>2</sub> evolution. (d) is the selected area in (c).
